# Supplementary material for: Optically active red-emitting Cu nanoclusters originating from complexation and redox reaction between copper(ii) andd/l-penicillamine
Source: Royal Society of Chemistry journal article supplement (doi:10.1039/c6nr01492e), 2016-01-01
Supplement: c6nr01492e1.pdf [file c6nr01492e1.pdf]

Supplementary material (ESI) for Nanoscale  
This journal is © The Royal Society of Chemistry 2015

## **Electronic Supporting Information**

*for*

### **Optically Active Red-emitting Cu Nanoclusters Originating from Complexation and Redox Reaction between Copper (II) and D/L-Penicillamine**

Tengfei Long, Yanjia Guo, Min Lin, Mengke Yuan, Zhongde Liu\* Chengzhi Huang

*Key Laboratory of Luminescent and Real-Time Analytical Chemistry, Ministry of  
Education, College of Pharmaceutical Sciences, Southwest University, Chongqing  
400715*

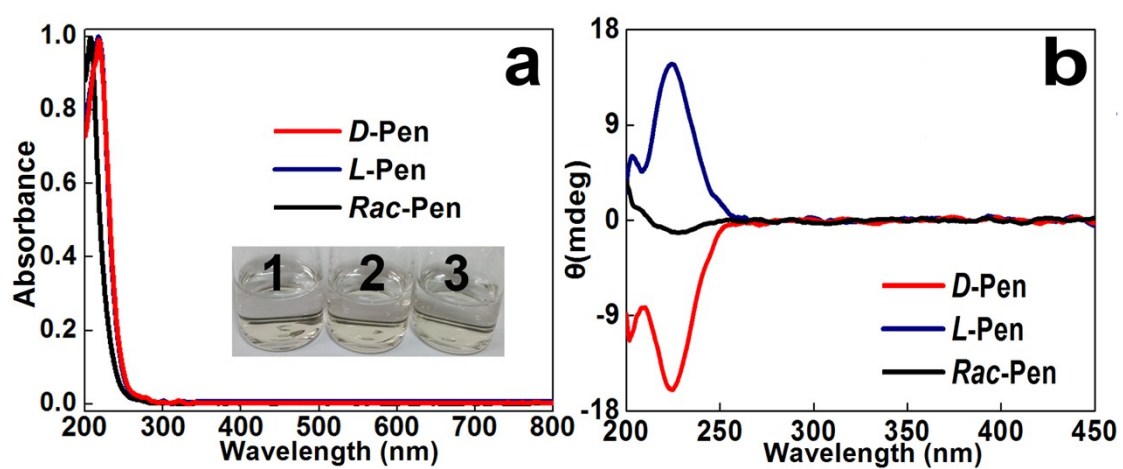

**Figure S1** The absorption (a) and CD (b) spectra of D-, L- and *Rac*-Pen, inset shows the photographs of D-, L- and *Rac*-Pen solution under daylight.

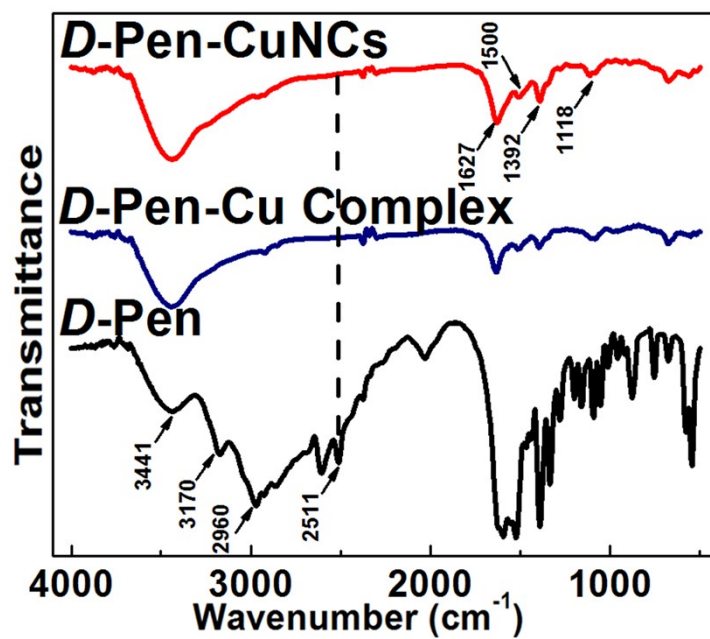

**Figure S2** The FT-IR spectra of D-Pen-CuNCs, D-Pen-Cu Complex, and D-Pen.

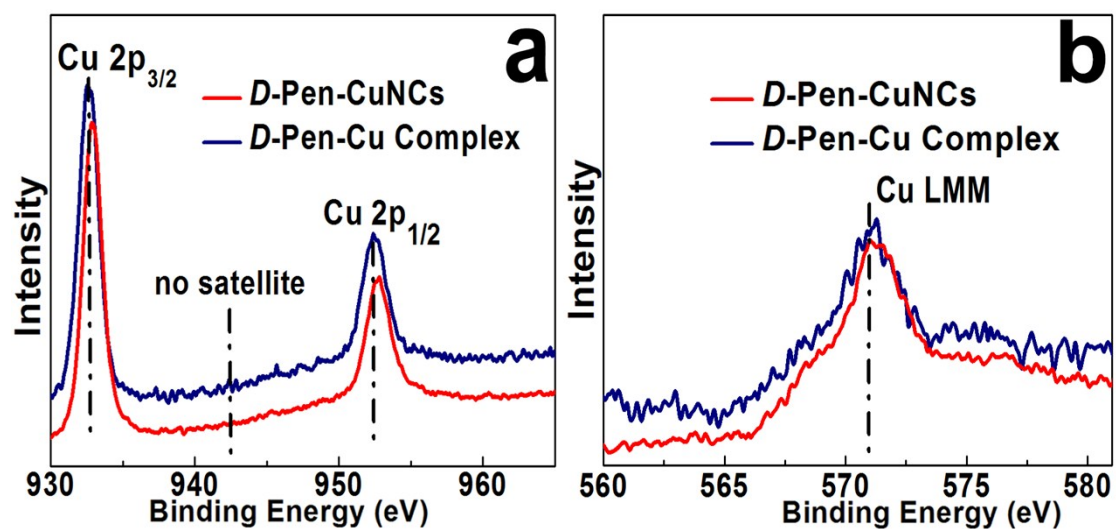

**Figure S3** (a) The XPS of Cu 2p electrons for D-Pen-CuNCs and D-Pen-Cu Complex; (b) the corresponding AES spectrum in the Cu LMM region of D-Pen-CuNCs and D-Pen-Cu Complex.

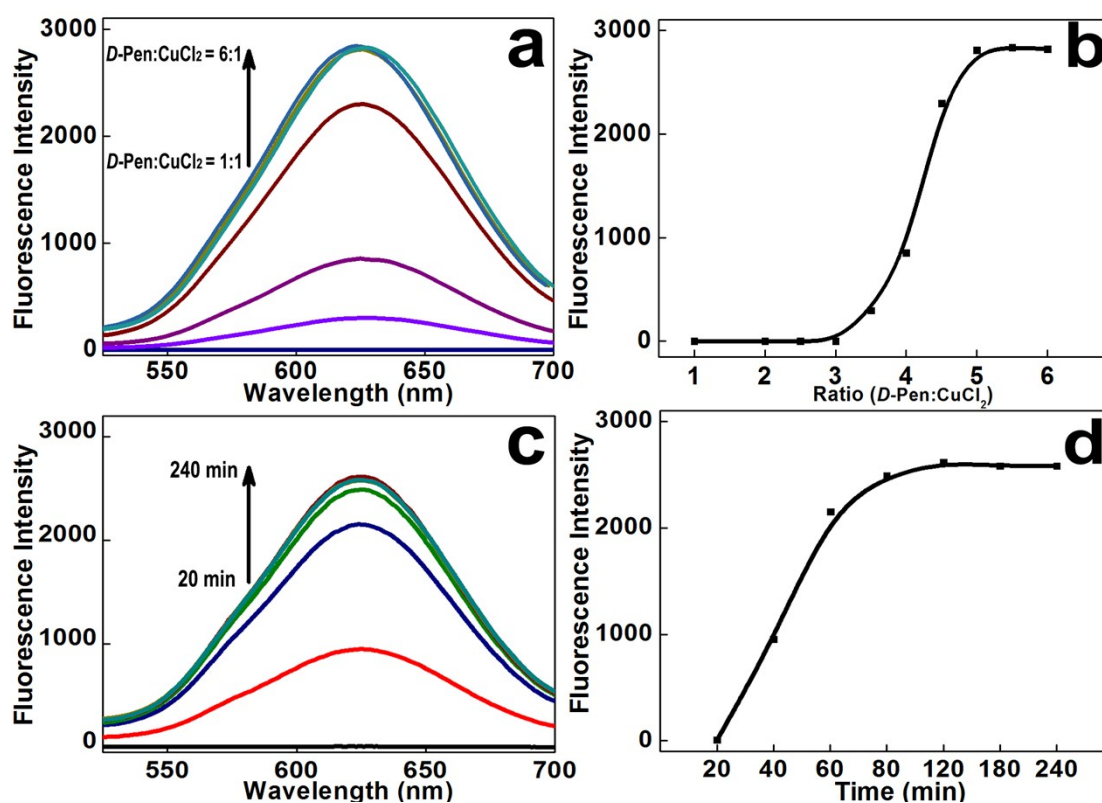

**Figure S4** (a) PL spectra of the resultant D-Pen-CuNCs with the increasing ratio of D-Pen to copper (II); (b) Plots of PL intensity of D-Pen-CuNCs at 625 nm *versus* the ratio of D-Pen to copper (II); (c) PL spectra of the resultant D-Pen-CuNCs with the prolonging reaction time at a fixed concentration of D-Pen and copper (II); (d) Plots of PL intensity of D-Pen-CuNCs at 625 nm *versus* the reaction time.

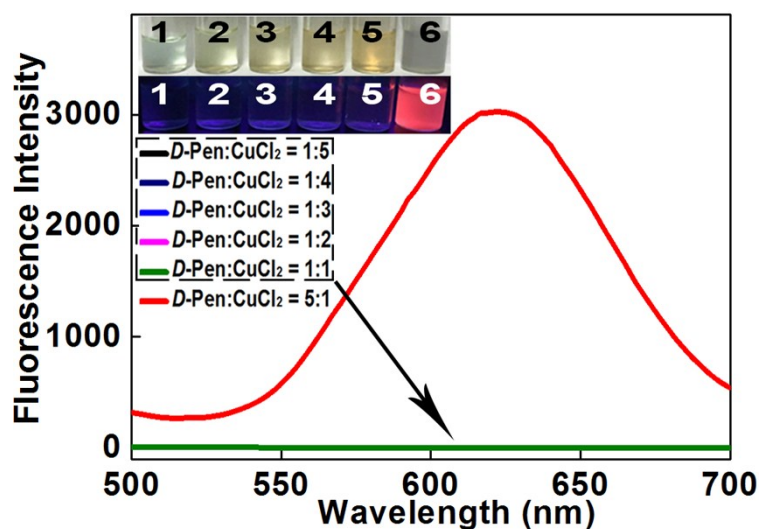

**Figure S5** Comparison of PL spectra between the resultant complexes with the different ratios of D-Pen to excessive copper (II) and the resultant D-Pen-CuNCs with a fixed 5:1 ratio of D-Pen to copper (II). The inset displays the photographs of the corresponding complexes (1-5) and CuNCs (6) under the irradiation of visible and 365 nm UV light.

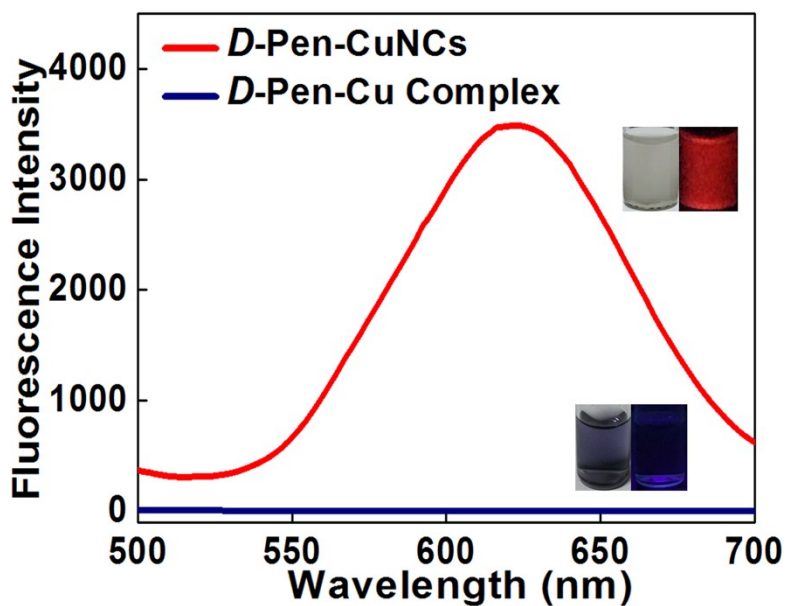

**Figure S6** Comparison of PL spectra between D-Pen-CuNCs and D-Pen-Cu Complex. The insets display the photographs of the corresponding CuNCs and Cu complex solution under the irradiation of visible and 365 nm UV light.

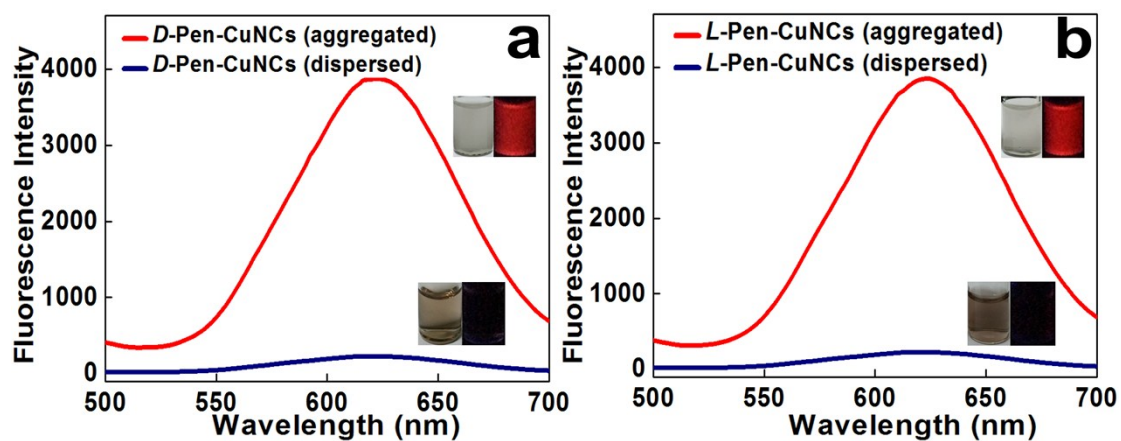

**Figure S7** The PL spectra of the aggregated and dispersed D-Pen-CuNCs (a) and L-Pen-CuNCs (b); the inset displays the photographs of the corresponding aggregated and dispersed CuNCs under the irradiation of visible and UV light.



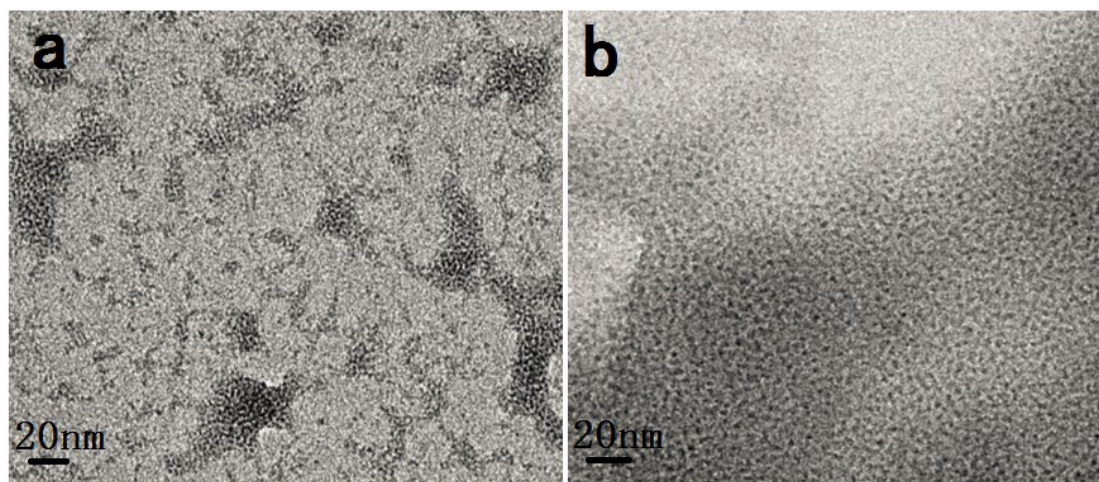

**Figure S8** TEM images of the aggregated L-Pen-CuNCs on the reaction condition (a) and the dispersed species by adjusting pH to alkaline environment (b).

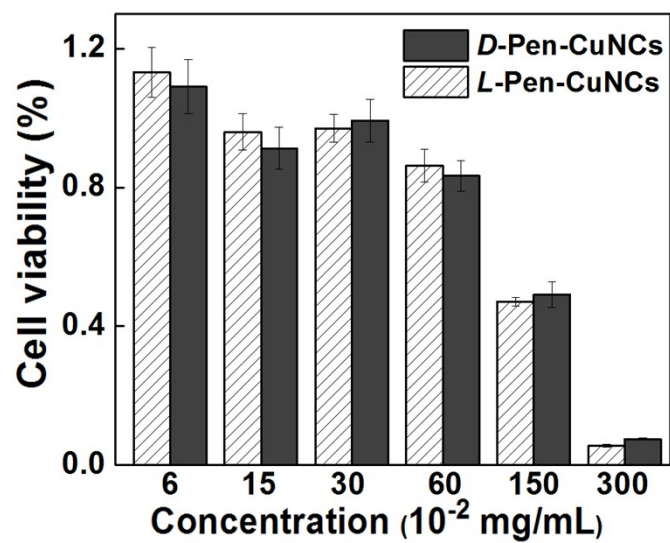

**Figure S9** Cellular toxicity of D-Pen- and L-Pen-CuNCs on Hep-2 cell viability.

**Table S1** The absolute PL QYs of *D*-Pen-CuNCs

|          | CuCl <sub>2</sub> ( $\lambda_{\text{ex}}$ 372 nm) | Cu(NO <sub>3</sub> ) <sub>2</sub> ( $\lambda_{\text{ex}}$ 345 nm) | CuSO <sub>4</sub> ( $\lambda_{\text{ex}}$ 372 nm) |
|----------|---------------------------------------------------|-------------------------------------------------------------------|---------------------------------------------------|
| <i>a</i> | 18.6%                                             | 21.4%                                                             | 12.5%                                             |
| <i>b</i> | 42.8%                                             | 50.6%                                                             | 42.3%                                             |

*a* Concentration: Cu (II) precursors, 1.0 mM; *D*-Pen, 10 mM; *b* Cu (II) precursors, 3.0 mM; *D*-Pen, 15 mM. The mixture was reacted for 2 h. The isolation and purification of the resultant CuNCs were performed through repeated centrifugation and washing steps, and then the products were used for the measurements of the PL QYs.
